# Supplementary material
Source: PubMed Central journal article supplement (PMC2527468)
Supplement: NIHMS63202-supplement-1si20051005_06.pdf [file NIHMS63202-supplement-1si20051005_06.pdf]

Supplementary Information For:  
Coordinative Properties of Highly Fluorinated  
Solvents with Amino and Ether Groups

*Paul G. Boswell,<sup>†</sup> Elizabeth C. Lugert,<sup>†</sup> József Rábai,<sup>‡</sup> Elizabeth A. Amin,<sup>†</sup> and Philippe  
Bühlmann<sup>\*†</sup>*

<sup>†</sup>University of Minnesota, Department of Chemistry 207 Pleasant Street SE, Minneapolis,  
Minnesota 55455

<sup>‡</sup>Eötvös Loránd University, Department of Organic Chemistry, P.O. Box 32, H-1518,  
Budapest 112, Hungary

E-mail: buhlmann@chem.umn.edu

**Proof of**  $\Phi_{j,\text{ref}} - \Phi_{i,\text{ref}} = (RT/zF) \ln K_{i,j}^{\text{pot,ref}}$

Equation 10 applied to an electrode based on the reference membrane responding to a solution A containing ion i gives

$$\Delta E_{i,\text{ref}} = E_{i,\text{ref}}^{\circ} + \frac{R T}{zF} \ln \frac{a_{i,\text{aq}}}{c_{i,\text{ref}}} \quad (\text{S1})$$

The response of the same electrode to a solution B containing ion j (with the same charge as ion i) at the same activity is given by

$$\Delta E_{j,\text{ref}} = E_{j,\text{ref}}^{\circ} + \frac{R T}{zF} \ln \left( \frac{a_{j,\text{aq}}}{c_{j,\text{ref}}} \right) \quad (\text{S2})$$

Using a selectivity coefficient, the response of the same electrode can also be formulated as follows (note the change in the index i of the  $E_{i,\text{ref}}^{\circ}$  and  $c_{i,\text{ref}}$  terms):

$$\Delta E_{j,\text{ref}} = E_{i,\text{ref}}^{\circ} + \frac{R T}{zF} \ln \left( K_{i,j}^{\text{pot,ref}} \frac{a_{j,\text{aq}}}{c_{i,\text{ref}}} \right) \quad (\text{S3})$$

The difference between the electrode's response to solution B and to solution A equals  $\Phi_{j,\text{ref}} - \Phi_{i,\text{ref}}$  and can be obtained from equations S2 and S3:

$$\Phi_{j,\text{ref}} - \Phi_{i,\text{ref}} = \Delta E_{j,\text{ref}} - \Delta E_{i,\text{ref}} = E_{i,\text{ref}}^{\circ} + \frac{R T}{zF} \ln \left( K_{i,j}^{\text{pot,ref}} \frac{a_{j,\text{aq}}}{c_{i,\text{ref}}} \right) - E_{i,\text{ref}}^{\circ} - \frac{R T}{zF} \ln \frac{a_{i,\text{aq}}}{c_{i,\text{ref}}} \quad (\text{S4})$$

Since the activities of the ions in the two aqueous solutions are identical, this can be simplified to

$$\Phi_{j,\text{ref}} - \Phi_{i,\text{ref}} = \frac{R T}{zF} \ln \left( K_{i,j}^{\text{pot,ref}} \frac{a_{j,\text{aq}}}{c_{i,\text{ref}}} \right) - \frac{R T}{zF} \ln \frac{a_{i,\text{aq}}}{c_{i,\text{ref}}} = \frac{R T}{zF} \ln K_{i,j}^{\text{pot,ref}} \quad (\text{S5})$$

**Proof of**  $c_{i,\text{ref}}/c_{i,\text{co}} = K_{i,j}^{\text{pot,co}}/K_{i,j}^{\text{pot,ref}}$  (**Equation 11**)

Equation 10 applied to an electrode with a membrane based on a fluoros solvent with the ability to interact with cations and responding to solution A containing ion i gives

$$\Delta E_{i,\text{co}} = E_{i,\text{co}}^{\circ} + \frac{R T}{zF} \ln \frac{a_{i,\text{aq}}}{c_{i,\text{co}}} \quad (\text{S6})$$

The response of the same electrode to solution B with ion j is given by

$$\Delta E_{j,\text{co}} = E_{j,\text{co}}^{\circ} + \frac{R T}{zF} \ln \left( \frac{a_{j,\text{aq}}}{c_{j,\text{co}}} \right) \quad (\text{S7})$$

Using a selectivity coefficient, the response of the same electrode could also be formulated as follows:

$$\Delta E_{j,\text{co}} = E_{i,\text{co}}^{\circ} + \frac{R T}{zF} \ln \left( K_{i,j}^{\text{pot,co}} \frac{a_{j,\text{aq}}}{c_{i,\text{co}}} \right) \quad (\text{S8})$$

The difference between the potentiometric responses of the two electrodes to solution B can be obtained from equations S2 and S7 to be

$$\Delta E_{j,\text{co}} - \Delta E_{j,\text{ref}} = E_{j,\text{co}}^{\circ} + \frac{R T}{zF} \ln \left( \frac{a_{j,\text{aq}}}{c_{j,\text{co}}} \right) - E_{j,\text{ref}}^{\circ} - \frac{R T}{zF} \ln \left( \frac{a_{j,\text{aq}}}{c_{j,\text{ref}}} \right) \quad (\text{S9})$$

The same difference between the potentiometric responses of the two electrodes to solution B can also be obtained from equations S3 and S8:

$$\Delta E_{j,\text{co}} - \Delta E_{j,\text{ref}} = E_{i,\text{co}}^{\circ} + \frac{R T}{zF} \ln \left( K_{i,j}^{\text{pot,co}} \frac{a_{j,\text{aq}}}{c_{i,\text{co}}} \right) - E_{i,\text{ref}}^{\circ} - \frac{R T}{zF} \ln \left( K_{i,j}^{\text{pot,ref}} \frac{a_{j,\text{aq}}}{c_{i,\text{ref}}} \right) \quad (\text{S10})$$

Since the right hand side of equation S9 must be equal to the right hand side of equation S10, it follows that

$$\ln \left( \frac{a_{j,\text{aq}}}{c_{j,\text{co}}} \right) - \ln \left( \frac{a_{j,\text{aq}}}{c_{j,\text{ref}}} \right) = \ln \left( K_{i,j}^{\text{pot,co}} \frac{a_{j,\text{aq}}}{c_{i,\text{co}}} \right) - \ln \left( K_{i,j}^{\text{pot,ref}} \frac{a_{j,\text{aq}}}{c_{i,\text{ref}}} \right) \quad (\text{S11})$$

Since for the non-coordinating ion  $i$  it is true that  $c_{i,\text{co}} = c_{i,\text{ref}}$ , equation S11 can be further simplified to give the desired equation:

$$\frac{c_{j,\text{ref}}}{c_{j,\text{co}}} = \frac{K_{i,j}^{\text{pot,co}}}{K_{i,j}^{\text{pot,ref}}} \quad (\text{11})$$
